# Supplementary material for: Temporal and spatial trends of fentanyl co-occurrence in the illicit drug supply in the United States: a serial cross-sectional analysis
Source: PubMed Central journal article supplement (PMC11470258; doi:10.1016/j.lana.2024.100898), 2024-09-27
Supplement: mmc1.pdf [file mmc1.pdf]

## **Supplementary materials for:**

### **Temporal and spatial trends of fentanyl co-occurrence in the illicit drug supply in the United States: A serial cross-sectional analysis**

Tse Yang Lim, PhD; Huiru Dong, PhD; Erin Stringfellow, PhD, MSW; Zeynep Hasgul, MSc; Ju Park, PhD; Lukas Glos, MA; Reza Kazemi, PhD; Mohammad S. Jalali, PhD

Online repository at: <https://github.com/tseyanglim/NFLIS-analysis>

#### **Table of Contents**

Supplementary Methods

Supplementary Figure 1: Sample restrictions

Supplementary Table 1: Substance categorizations

Supplementary Table 2: Total reports & samples by substance

Supplementary Table 3: STROBE checklist

Supplementary Table 4: Mann-Kendall test results, monthly

Supplementary Table 5: Mann-Kendall test results, annual by state

Supplementary Figure 2: Additional state-level fentanyl co-occurrence rates

References

## Supplementary Methods

### NFLIS Data

Many details of the NFLIS program are publicly available online. NFLIS-Drug is the primary component of the program; a detailed discussion of its limitations and potential data issues can be found in <sup>1</sup>.

### NFLIS-Drug coverage

The NFLIS-Drug database aggregates drug chemistry analysis results voluntarily reported from forensic laboratories analyzing law enforcement drug seizures across the United States. The NFLIS-Drug network includes federal and all 50 state laboratory systems as well as over a hundred local or municipal laboratory systems, nearly 300 individual laboratories altogether.<sup>2</sup> While the NFLIS-Drug network has expanded over time, with a growing number of local or municipal laboratories, the vast majority of laboratories were already participating as of 2013 (the first year of data used in this analysis): 272 in 2013, growing to 284 in 2022.<sup>3,4</sup> The participating laboratories also handle the vast majority of drug analyses conducted nationally: 98.5% in 2022, up from 91% in 2013.<sup>3,4</sup> The reports in the NFLIS-Drug database thus represent a near-complete census of drug chemistry analyses conducted for law enforcement purposes in the United States.

Note that NFLIS-Drug annual summary reports and other aggregated data products typically present statistically adjusted or weighted numbers intended to correct for variation in which laboratories are reporting their data at any given time,<sup>1</sup> whereas this analysis uses raw counts that do not correct for such variation in reporting. DEA did not provide information on which laboratories reported which records or how they varied in their reporting coverage, precluding our making similar adjustments.

### Data structure & reporting

Record-level NFLIS-Drug data consist of drug reports, each representing a single instance of a specific substance detected, linked to unique seizure-level and item/sample-level identifiers. Generally, each *seizure* represents a single incident of law enforcement confiscating suspected drugs; a seizure can potentially result in multiple *items/samples* being submitted for forensic analysis, each of which in turn contains one or more substances, with each substance detected constituting a single *report*. Up to eight substances are reported for each item/sample.<sup>1</sup>

### Potential issues with coverage & reporting in NFLIS-Drug

While the database comprehensively covers most drug chemistry analysis results, those results are themselves not representative of the overall illicit drug supply, for several reasons.

First, drugs analyzed come from law enforcement seizures. Those seizures are not a representative sampling of the illicit drug supply at consumer level. Instead, the pattern of seizures reflects a combination of a) the actual consumer-level drug supply; b) the upstream structure of the illicit drug supply chain, e.g. major smuggling routes; and c) [successful] law enforcement efforts, which may or may not be related to a) and b). Some states, such as Texas or Ohio, may thus be over-represented in the database due to more aggressive enforcement efforts combined with being along major drug smuggling routes.

Second, the seizures included range from personal possession to large-scale seizures, and the number of samples reported from each seizure may not correspond to the size of the seizure – in principle a personal possession seizure could result in multiple samples reported, while a large-scale drug bust with hundreds of kilos of drugs may yield fewer reported samples. It is thus unclear from the available data what size of seizure (or where in the illicit supply chain) any given record comes from, and how this may reflect the broader drug supply.

Third, laboratories vary in how they define items/samples.<sup>1</sup> For instance, some laboratories may consider separate pills or even separate bags of powder packaged together to be a single item, whereas others may only consider each pill or bag to be a single item. Analysis of co-occurrence based on shared item/sample-level identifiers thus may not strictly reflect actual physical mixtures or combinations of substances, as opposed to broader co-presence. Furthermore, reporting in NFLIS is limited to 8 substances per sample; if more than 8 substances are detected, only 8 will be reported.

Fourth, analysis is not standardized across laboratories. Testing procedures, criteria, and thresholds may vary between laboratories.<sup>1</sup> Laboratories also do not necessarily have the capability to test for and identify every substance present in a sample; sometimes the necessary equipment, assays, references, etc. are not available. This issue primarily affects detection of less common substances, such as novel psychoactive substances or rare fentanyl analogues; detection of major drug categories, such as those included in our analysis, is not generally an issue. Importantly, most common forms of fentanyl have been systematically screened for throughout the entire study period (2013-2023).<sup>5</sup> Limitations in laboratory analyses are thus unlikely to substantially affect the results presented in this article.

Fifth, even aside from laboratory capabilities, there is substantial under-reporting in NFLIS-Drug due to analysis and reporting being driven primarily by law enforcement priorities. For instance, not all drugs seized are submitted for testing, with seizures intended to be used as evidence in legal proceedings generally prioritized. In analyzing samples or reporting substances detected, laboratories may prioritize identifying or reporting substances associated with harsher criminal penalties, such as fentanyl or Schedule I controlled substances, whereas non-controlled substances may often not be tested for (or not reported even if detected). To further complicate this challenge, these law enforcement priorities vary by jurisdiction – such as due to state-level controls on or decriminalization of certain substances – and over time.

For these reasons, NFLIS-Drug reports present only a partial and approximate picture of the overall illicit drug supply. Nevertheless, in the absence of any large-scale, systematic monitoring or regulation of the drug supply, NFLIS-Drug remains an essential (and the most comprehensive) source of information for identifying trends and patterns in the drug supply over time in the United States.

#### **Data fields available**

In addition to substance detected, location (state/county) and time (year/month) of seizure, and identifiers, the NFLIS-Drug records provided by DEA also included substance form (e.g., powder, pill, liquid). However, 52.3% of the drug reports were missing this data, so we excluded it from this analysis.

NFLIS-Drug also collects information on purity and sample weight; however, these data fields suffer substantial missingness and are of limited quality, with recording and reporting protocols varying widely across laboratories.<sup>1</sup> For instance, some laboratories may report total quantity of substance found as sample weight (e.g. a 5 lb bag of powder), whereas others may only report the quantity actually analyzed (e.g. a 0.5g sample). Due to concerns over data quality, DEA did not provide these data fields in the drug reports analyzed here.

Crucially, NFLIS-Drug does not include information on original drug identities (e.g., ‘seized as’ or ‘sold as’).

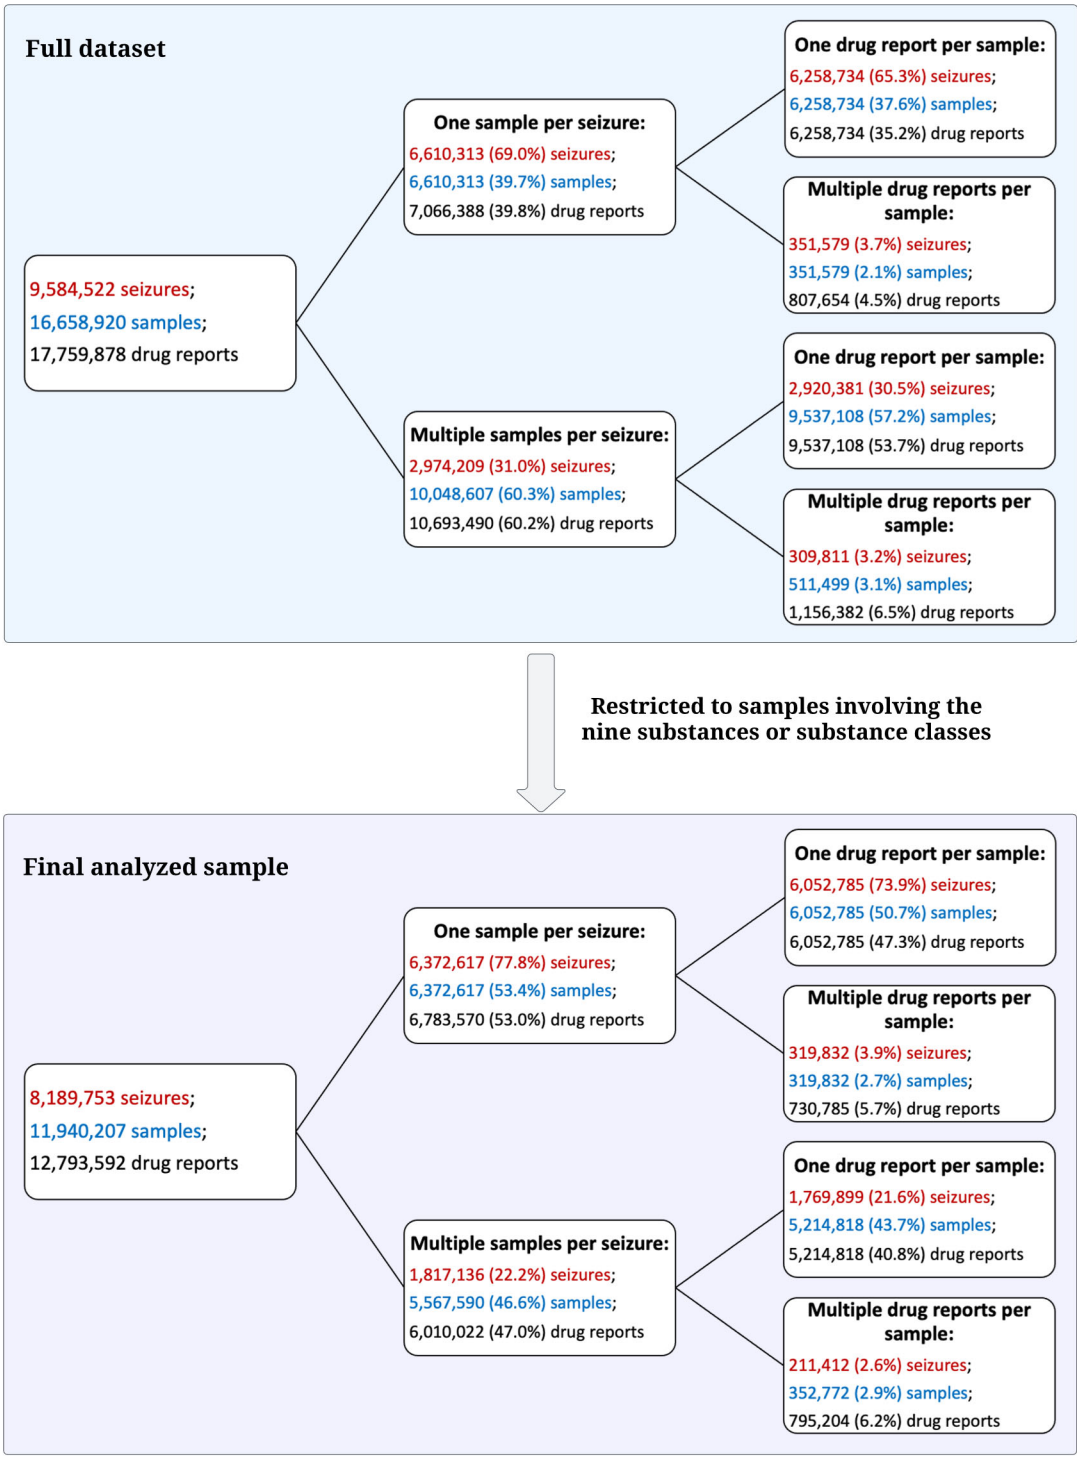

**Supplementary Figure 1.** Frequencies of seizures, samples, and drug reports based on the multi-level data structure among all NFLIS data from 2013-2023 across 50 states and the District of Columbia. Note that the data exclude approx. 425,000 reports from Queens County, NY, that were provided only in aggregate form.

**Supplementary Table 1.** Substance names reported in the NFLIS drug reports and their categorized substance/substance class.

\*Note that while some substance classes are identified as ‘prescription’ because the substances included are available by prescription, the actual samples analyzed and reported may be illicitly manufactured.

| <b>Categorized substance / substance class</b> | <b>Substance name</b>                            |
|------------------------------------------------|--------------------------------------------------|
| <b>Heroin</b>                                  | heroin                                           |
| <b>Prescription* opioids</b>                   | oxycodone                                        |
|                                                | hydrocodone                                      |
|                                                | buprenorphine                                    |
|                                                | morphine                                         |
|                                                | methadone                                        |
|                                                | hydromorphone                                    |
|                                                | oxymorphone                                      |
| <b>Hallucinogens</b>                           | psilocin/psilocybin                              |
|                                                | psilocin/psilocibin                              |
|                                                | psilocin                                         |
|                                                | psilocibin                                       |
|                                                | psilocybin                                       |
|                                                | lysergic acid diethylamide (lsd)                 |
|                                                | Lsd                                              |
|                                                | 25i-nbome                                        |
|                                                | 25c-nbome                                        |
|                                                | dimethyltryptamine (dmt)                         |
|                                                | dimethyltryptamine                               |
|                                                | dmt                                              |
|                                                | pcp                                              |
|                                                | phencyclidine (pcp)                              |
|                                                | 3cl-pcp                                          |
| <b>Club drugs</b>                              | ketamine                                         |
|                                                | 3,4-methylenedioxyamphetamine (mda)              |
|                                                | ethylone                                         |
|                                                | mda                                              |
|                                                | mdma                                             |
|                                                | methylone (mdmc)                                 |
|                                                | n-cyclohexylmethylone                            |
| <b>Methamphetamine</b>                         | methamphetamine                                  |
|                                                | amphetamines/methamphetamines                    |
| <b>Cocaine</b>                                 | cocaine                                          |
| <b>Prescription* stimulants</b>                | amphetamine                                      |
|                                                | lisdexamfetamine                                 |
|                                                | methylphenidate                                  |
| <b>Prescription* benzodiazepines</b>           | alprazolam                                       |
|                                                | clonazepam                                       |
|                                                | diazepam                                         |
|                                                | lorazepam                                        |
| <b>Cannabinoids</b>                            | cannabidiol                                      |
|                                                | cannabinol                                       |
|                                                | cannabis/thc                                     |
|                                                | delta-8-tetrahydrocannabinol                     |
|                                                | tetrahydrocannabinol/tetrahydrocannabinolic acid |
| <b>Fentanyl and fentanyl-related</b>           | fentanyl                                         |
|                                                | Anpp                                             |
|                                                | acetyl fentanyl                                  |
|                                                | carfentanil                                      |
|                                                | fluorofentanyl                                   |
|                                                | furanyl fentanyl                                 |
|                                                | para-fluorofentanyl                              |
|                                                | valeryl fentanyl                                 |
|                                                | fuoroisobutyryl fentanyl                         |
|                                                | 4-fluoroisobutyryl fentanyl                      |
|                                                | cyclopropyl fentanyl                             |
|                                                | acryl fentanyl                                   |
|                                                | methoxyacetyl fentanyl                           |

|                                                         |
|---------------------------------------------------------|
| 3-methylfentanyl                                        |
| phenethyl 4-anpp                                        |
| butyryl fentanyl                                        |
| benzylfentanyl                                          |
| fluorobutyryl fentanyl                                  |
| phenyl fentanyl                                         |
| fluoro 4-anpp                                           |
| p-fluorobutyryl fentanyl                                |
| cyclopropyl/crotonyl fentanyl                           |
| para-fluoro furanyl fentanyl                            |
| fluoro furanyl fentanyl                                 |
| fentanyl-related compound (unspecified)                 |
| furanyl benzyl fentanyl                                 |
| para-fluoro 4-anpp                                      |
| crotonyl fentanyl                                       |
| n-methyl norfentanyl                                    |
| chlorofentanyl                                          |
| fluorophenethyl 4-anpp                                  |
| ortho-chlorofentanyl                                    |
| ortho-fluorofentanyl                                    |
| p-fluoro benzyl fentanyl                                |
| para-chlorofentanyl                                     |
| norfentanyl                                             |
| isobutyryl fentanyl                                     |
| cis-3-methylfentanyl                                    |
| thiofuranyl fentanyl                                    |
| trans-3-methylfentanyl                                  |
| 1-phenethyl-4-piperidone                                |
| trahydrofuran fentanyl                                  |
| fentanyl carbamate                                      |
| furanyl/3-furanyl fentanyl                              |
| isovaleryl fentanyl                                     |
| n-(1-phenethyl-4-piperidyl)-n-phenethylpropanamide      |
| beta-hydroxythiofentanyl                                |
| p-fluoro cyclopropyl benzyl fentanyl                    |
| meta-fluorofentanyl                                     |
| meta-fluoro 4-anpp                                      |
| methyl acetyl fentanyl                                  |
| n-phenyl-4-piperidinamine                               |
| 1-phenethyl-4-propionyloxypiperidine                    |
| acetyl-alpha-methylfentanyl                             |
| chloro 4-anpp                                           |
| para-fluoro valeryl fentanyl                            |
| alpha'-methyl butyryl fentanyl                          |
| 1-propionyl-4-anilinopiperidine                         |
| 3-furanyl fentanyl                                      |
| 4-carbomethoxy 4-anpp                                   |
| 4-fluorophenethyl 4-anpp                                |
| beta-methyl acetyl fentanyl                             |
| flurobutyryl/fluoroisobutyryl fentanyl                  |
| ortho-chloro 4-anpp                                     |
| para-methylfentanyl                                     |
| 3',4'-dimethoxy fentanyl                                |
| methylfentanyl                                          |
| ortho-methyl 4-anpp                                     |
| n-propionyl norfentanyl                                 |
| 1-phenethyl-4-hydroxypiperidine                         |
| 4'-methyl acetyl fentanyl                               |
| beta-methylfentanyl                                     |
| cyclopentyl fentanyl                                    |
| methyl 4-anpp                                           |
| methyl cyclopropyl fentanyl                             |
| n-benzyl fluoro norfentanyl                             |
| n,n-phenethyl-phenyl-1-(2-phenylethyl)piperidin-4-amine |
| o-fluoro acrylfentanyl                                  |
| ortho-fluoro furanyl fentanyl                           |

|                                                     |
|-----------------------------------------------------|
| 1-boc-4-piperidone                                  |
| 3-fluorofentanyl                                    |
| 3-fluoroisobutyryl fentanyl                         |
| benzodioxole fentanyl                               |
| ortho-fluoro 4-anpp                                 |
| ortho-methyl acetyl fentanyl                        |
| sufentanil                                          |
| 3-phenylpropanoyl fentanyl                          |
| acetyl norfentanyl                                  |
| alpha-methylfentanyl                                |
| benzoylbenzyl fentanyl                              |
| benzyl acryl fentanyl                               |
| fluoro 4-anilinopiperidine                          |
| meta-fluoro furanyl fentanyl                        |
| meta-methyl 4-anpp                                  |
| methoxybutyryl fentanyl                             |
| n-boc norfentanyl                                   |
| ocfentanil                                          |
| p-methoxybutyryl fentanyl                           |
| para-methoxy furanyl fentanyl                       |
| tetrahydrothiofuranyl fentanyl                      |
| valeryl/isovaleryl fentanyl                         |
| 4-anpp                                              |
| 1-boc-4-(4-fluoroanilino)piperidine                 |
| 2-chloro 4-anpp                                     |
| 2-fluoro 4-anpp                                     |
| 3-methylthiofentanyl                                |
| acryl-alpha-methylfentanyl                          |
| alfentanil                                          |
| benzylacryl fentanyl                                |
| bipiperidinyl 4-anpp                                |
| ethyl 4-anpp                                        |
| fluoro acetyl fentanyl                              |
| fluoro phenethyl 4-anpp                             |
| fluoro valeryl fentanyl                             |
| lofentanil                                          |
| n-(1-phenethyl-4-piperidyl)-n-phenethylpropionamide |
| n-(1-tert-butyl-4-piperidyl)-n-phenylpropanamide    |
| n-benzyl furanyl fentanyl                           |
| n-ethyl norfentanyl                                 |
| remifentanil                                        |
| tetrahydrofuranyl fentanyl                          |
| thenylfentanyl                                      |
| thiofentanyl                                        |
| alpha'-methylbutyryl fentanyl                       |
| alpha-methylthiofentanyl                            |
| beta'-phenyl fentanyl                               |
| beta-hydroxy-3-methylfentanyl                       |
| beta-hydroxyfentanyl                                |
| meta-fluoroisobutyryl fentanyl                      |
| ortho-fluoroacryl fentanyl                          |
| ortho-fluorobutyryl fentanyl                        |
| ortho-fluoroisobutyryl fentanyl                     |
| ortho-methoxy furanyl fentanyl                      |
| ortho-methoxybutyryl fentanyl                       |
| para-fluoro benzyl fentanyl                         |
| para-fluoro cyclopropyl benzyl fentanyl             |
| para-fluoroacryl fentanyl                           |
| para-fluorobutyryl fentanyl                         |
| para-fluoroisobutyryl fentanyl                      |
| para-methoxybutyryl fentanyl                        |
| para-fluoro phenethyl 4-anpp                        |

**Supplementary Table 2.** Total number of drug reports and samples for each substance and the number of samples with co-occurring fentanyl in the United States, 2013-2023

| <b>Substance</b>                    | <b>Number of drug reports</b> | <b>Number of samples</b> | <b>Number of samples with fentanyl co-occurrence</b> |
|-------------------------------------|-------------------------------|--------------------------|------------------------------------------------------|
| <b>Fentanyl</b>                     | 1125645                       | 1010939                  | ---                                                  |
| <b>Methamphetamine</b>              | 3850926                       | 3850672                  | 18628                                                |
| <b>Cannabinoids</b>                 | 3203792                       | 3177205                  | 1580                                                 |
| <b>Cocaine</b>                      | 2014562                       | 2012480                  | 27621                                                |
| <b>Heroin</b>                       | 1326703                       | 1325203                  | 179284                                               |
| <b>Prescription opioids</b>         | 797185                        | 795166                   | 2909                                                 |
| <b>Prescription benzodiazepines</b> | 483483                        | 482977                   | 785                                                  |
| <b>Prescription stimulants</b>      | 144830                        | 142107                   | 108                                                  |
| <b>Hallucinogens</b>                | 150382                        | 144235                   | 131                                                  |
| <b>Club drugs</b>                   | 99792                         | 97025                    | 2121                                                 |



**Supplementary Table 3. STROBE checklist**

| <b>Item</b>               | <b>No</b> | <b>Recommendation</b>                                                                                                                                                                                        | <b>Page No</b>                               |
|---------------------------|-----------|--------------------------------------------------------------------------------------------------------------------------------------------------------------------------------------------------------------|----------------------------------------------|
| <b>Title and abstract</b> | 1         | (a) Indicate the study's design with a commonly used term in the title or the abstract                                                                                                                       | Page 1                                       |
|                           |           | (b) Provide in the abstract an informative and balanced summary of what was done and what was found                                                                                                          | Page 1                                       |
| <b>Introduction</b>       |           |                                                                                                                                                                                                              |                                              |
| Background/rationale      | 2         | Explain the scientific background and rationale for the investigation being reported                                                                                                                         | Intro, para 1-4                              |
| Objectives                | 3         | State specific objectives, including any prespecified hypotheses                                                                                                                                             | Intro, para 5                                |
| <b>Methods</b>            |           |                                                                                                                                                                                                              |                                              |
| Study design              | 4         | Present key elements of study design early in the paper                                                                                                                                                      | Methods, para 1-5                            |
| Setting                   | 5         | Describe the setting, locations, and relevant dates, including periods of recruitment, exposure, follow-up, and data collection                                                                              | Methods, para 1-3;<br>Supplementary Methods  |
| Participants              | 6         | (a) Give the eligibility criteria, and the sources and methods of selection of participants                                                                                                                  | Methods, para 1-3;<br>Supplementary Methods  |
| Variables                 | 7         | Clearly define all outcomes, exposures, predictors, potential confounders, and effect modifiers. Give diagnostic criteria, if applicable                                                                     | Methods, para 1-3;<br>Supplementary Methods  |
| Data sources/measurement  | 8         | For each variable of interest, give sources of data and details of methods of assessment (measurement). Describe comparability of assessment methods if there is more than one group                         | Methods, para 1-3;<br>Supplementary Methods  |
| Bias                      | 9         | Describe any efforts to address potential sources of bias                                                                                                                                                    | Methods, para 5;<br>Limitations              |
| Study size                | 10        | Explain how the study size was arrived at                                                                                                                                                                    | Methods, para 3-4;<br>Supplementary Figure 1 |
| Quantitative variables    | 11        | Explain how quantitative variables were handled in the analyses. If applicable, describe which groupings were chosen and why                                                                                 | Methods, para 3-4;<br>Supplementary Methods  |
| Statistical methods       | 12        | (a) Describe all statistical methods, including those used to control for confounding                                                                                                                        | Methods, para 3-5;                           |
|                           |           | (b) Describe any methods used to examine subgroups and interactions                                                                                                                                          | Methods, para 3-5;                           |
|                           |           | (c) Explain how missing data were addressed                                                                                                                                                                  | Methods, para 1-5;                           |
|                           |           | (d) If applicable, describe analytical methods taking account of sampling strategy                                                                                                                           | Methods, para 3-5;                           |
|                           |           | (e) Describe any sensitivity analyses                                                                                                                                                                        | Methods, para 3-5;                           |
| <b>Results</b>            |           |                                                                                                                                                                                                              |                                              |
| Participants              | 13        | (a) Report numbers of individuals at each stage of study—eg numbers potentially eligible, examined for eligibility, confirmed eligible, included in the study, completing follow-up, and analysed            | Results para 1-2<br>Supplementary Figure 1   |
|                           |           | (b) Give reasons for non-participation at each stage                                                                                                                                                         | Results para 1-2                             |
|                           |           | (c) Consider use of a flow diagram                                                                                                                                                                           | Supplementary Figure 1                       |
| Descriptive data          | 14        | (a) Give characteristics of study participants (eg demographic, clinical, social) and information on exposures and potential confounders                                                                     | Results para 2                               |
|                           |           | (b) Indicate number of participants with missing data for each variable of interest                                                                                                                          | Supplementary Methods                        |
| Outcome data              | 15        | Report numbers of outcome events or summary measures                                                                                                                                                         | Results para 2                               |
| Main results              | 16        | (a) Give unadjusted estimates and, if applicable, confounder-adjusted estimates and their precision (eg, 95% confidence interval). Make clear which confounders were adjusted for and why they were included | Results para 3-7                             |
|                           |           | (b) Report category boundaries when continuous variables were categorized                                                                                                                                    | Not relevant                                 |
|                           |           | (c) If relevant, consider translating estimates of relative risk into absolute risk for a meaningful time period                                                                                             | Not relevant                                 |
| Other analyses            | 17        | Report other analyses done—eg analyses of subgroups and interactions, and sensitivity analyses                                                                                                               | S3. Additional Results                       |
| <b>Discussion</b>         |           |                                                                                                                                                                                                              |                                              |
| <b>Key results</b>        | 18        | Summarise key results with reference to study objectives                                                                                                                                                     |                                              |
| Limitations               | 19        | Discuss limitations of the study, taking into account sources of potential bias or imprecision. Discuss both direction and magnitude of any potential bias                                                   | Discussion, para 9-14                        |
| Interpretation            | 20        | Give a cautious overall interpretation of results considering objectives, limitations, multiplicity of analyses, results from similar studies, and other relevant evidence                                   | Discussion, para 1-8                         |
| Generalisability          | 21        | Discuss the generalisability (external validity) of the study results                                                                                                                                        | Discussion, para 7                           |
| <b>Other information</b>  |           |                                                                                                                                                                                                              |                                              |
| Funding                   | 22        | Give the source of funding and the role of the funders for the present study and, if applicable, for the original study on which the present article is based                                                | Acknowledgements                             |

**Supplementary Table 4.** Mann-Kendall trend test results for monthly proportion of each substance category with co-occurring fentanyl, aggregated nationally, 2013-2023

| <b>Substance category</b>    | <b>Tau</b> | <b>p value</b> |
|------------------------------|------------|----------------|
| Cannabinoids                 | 0.78713    | <0.0001        |
| Club drugs                   | 0.49364    | <0.0001        |
| Cocaine                      | 0.88252    | <0.0001        |
| Hallucinogens                | 0.53836    | <0.0001        |
| Heroin                       | 0.94569    | <0.0001        |
| Methamphetamine              | 0.89029    | <0.0001        |
| Prescription benzodiazepines | 0.6464     | <0.0001        |
| Prescription opioids         | 0.76338    | <0.0001        |
| Prescription stimulants      | 0.36302    | <0.0001        |

**Supplementary Table 5.** Mann-Kendall trend test results for yearly proportion of each substance category with co-occurring fentanyl, by state and substance category, 2013-2023. Tabulated values are  $p$  values for the Mann-Kendall test. Color indicates co-occurrence trend direction while intensity indicates significance – light blue indicates decreasing trend with  $p \geq 0.05$  and orange indicates increasing trend with different levels of statistical significance:  $p \geq 0.05$ ;  $0.05 > p \geq 0.001$ ;  $0.001 > p \geq 0.0001$ ;  $p < 0.0001$ . NaN values indicate insufficient data to calculate the Mann-Kendall test statistic.

|    | 1      | 2      | 3       | 4     | 5       | 6       | 7       | 8      | 9     |
|----|--------|--------|---------|-------|---------|---------|---------|--------|-------|
| AK | NaN    | 0.16   | 0.06    | NaN   | 0.016   | 0.005   | NaN     | 0.64   | NaN   |
| AL | 0.023  | 0.11   | 0.0008  | NaN   | <0.0001 | 0.003   | 0.64    | 0.24   | NaN   |
| AR | NaN    | 0.87   | 0.008   | NaN   | 0.009   | 0.003   | NaN     | NaN    | 0.43  |
| AZ | 0.014  | 0.52   | 0.0002  | 0.15  | 0.0007  | <0.0001 | 0.032   | 0.23   | 0.15  |
| CA | 0.003  | 0.10   | 0.0002  | 0.06  | <0.0001 | <0.0001 | 0.001   | 0.0001 | 0.08  |
| CO | 0.10   | 0.24   | 0.008   | NaN   | 0.0002  | 0.0002  | 0.035   | 0.009  | 0.64  |
| CT | 0.032  | 0.11   | 0.001   | 0.16  | <0.0001 | 0.55    | 0.27    | 0.94   | NaN   |
| DC | 0.24   | NaN    | 0.0004  | NaN   | <0.0001 | 0.67    | NaN     | NaN    | NaN   |
| DE | NaN    | 0.24   | 0.15    | NaN   | 0.0008  | 0.64    | NaN     | NaN    | NaN   |
| FL | 0.01   | 0.14   | 0.002   | 0.43  | <0.0001 | 0.0002  | 0.13    | 0.013  | 0.35  |
| GA | 0.87   | 0.87   | 0.015   | NaN   | 0.0006  | 0.01    | 0.35    | 0.10   | NaN   |
| HI | NaN    | NaN    | 0.009   | NaN   | 0.11    | 0.028   | NaN     | NaN    | NaN   |
| IA | 0.87   | 0.32   | 0.16    | 0.43  | 0.006   | 0.08    | NaN     | 0.93   | NaN   |
| ID | 0.06   | 0.035  | 0.028   | NaN   | 0.001   | 0.007   | 0.08    | 0.009  | NaN   |
| IL | 0.006  | 0.004  | <0.0001 | 0.15  | <0.0001 | 0.004   | 0.07    | 0.001  | 0.64  |
| IN | 0.028  | 0.87   | 0.004   | NaN   | 0.0002  | 0.004   | 0.87    | 0.32   | NaN   |
| KS | 0.005  | 0.10   | 0.001   | 0.27  | 0.0008  | 0.0004  | 0.06    | 0.004  | 0.35  |
| KY | 0.001  | 0.024  | 0.0008  | 0.10  | <0.0001 | 0.0002  | 0.022   | 0.0002 | 0.07  |
| LA | 0.27   | 0.16   | 0.003   | NaN   | 0.0004  | 0.045   | NaN     | 0.008  | NaN   |
| MA | 0.07   | 0.009  | 0.64    | 0.43  | 0.0006  | 0.53    | 0.17    | 0.81   | NaN   |
| MD | 0.001  | 0.31   | 0.0006  | 0.07  | <0.0001 | 0.002   | 0.015   | 0.07   | 0.15  |
| ME | NaN    | 0.87   | 0.004   | NaN   | 0.0006  | 0.35    | 0.48    | NaN    | 0.64  |
| MI | 0.07   | 0.43   | 0.001   | NaN   | <0.0001 | 0.005   | 0.32    | 0.27   | NaN   |
| MN | 0.80   | 0.67   | 0.002   | 0.11  | 0.0001  | 0.015   | 0.17    | 0.34   | NaN   |
| MO | 0.07   | 0.15   | 0.0002  | 0.87  | 0.002   | 0.001   | 0.004   | 0.0006 | 0.07  |
| MS | 0.028  | 0.64   | 0.0002  | 0.64  | 0.0004  | 0.0001  | 0.27    | 0.08   | NaN   |
| MT | 0.27   | NaN    | 0.27    | NaN   | 0.001   | 0.001   | NaN     | 0.64   | NaN   |
| NC | 0.23   | 0.52   | 0.14    | NaN   | 0.06    | 0.94    | 0.87    | 0.51   | NaN   |
| ND | 0.64   | 0.64   | 0.84    | NaN   | 0.41    | 0.41    | 0.87    | 0.87   | NaN   |
| NE | 0.64   | NaN    | 0.045   | NaN   | 0.005   | 0.021   | 0.64    | 0.84   | NaN   |
| NH | 0.62   | 0.62   | 0.64    | 0.64  | 0.35    | 1.00    | 1.00    | 0.87   | 0.32  |
| NJ | 0.004  | 0.10   | <0.0001 | 0.002 | <0.0001 | 0.14    | 0.0007  | 0.001  | 0.021 |
| NM | 0.06   | 0.045  | 0.002   | 0.43  | 0.0002  | 0.001   | 0.24    | 0.35   | NaN   |
| NV | 0.10   | 0.87   | 0.0008  | NaN   | 0.0007  | 0.002   | NaN     | 0.036  | NaN   |
| NY | 0.87   | 0.31   | 0.002   | 0.81  | <0.0001 | 0.015   | 0.27    | 0.001  | 0.24  |
| OH | 0.001  | 0.006  | <0.0001 | 0.036 | 0.0002  | 0.0006  | <0.0001 | 0.003  | 0.13  |
| OK | 0.014  | 0.15   | 0.013   | 0.27  | 0.0001  | 0.002   | 0.032   | 0.07   | NaN   |
| OR | 0.64   | 0.35   | 0.009   | NaN   | <0.0001 | 0.0002  | 0.55    | 0.67   | NaN   |
| PA | 0.0002 | 0.006  | 0.0003  | 0.049 | <0.0001 | <0.0001 | 0.07    | 0.16   | 0.049 |
| RI | 1.00   | 0.60   | 0.0004  | NaN   | 0.06    | 0.32    | NaN     | NaN    | NaN   |
| SC | 0.016  | 0.26   | 0.0002  | 0.64  | 0.0003  | 0.0001  | 0.003   | 0.20   | 0.81  |
| SD | NaN    | NaN    | NaN     | NaN   | 0.005   | 0.10    | NaN     | NaN    | NaN   |
| TN | 0.001  | 0.07   | 0.006   | 0.27  | 0.002   | 0.015   | 0.84    | 0.52   | NaN   |
| TX | 0.016  | 0.021  | 0.0002  | 0.15  | <0.0001 | 0.0004  | 0.51    | 0.008  | NaN   |
| UT | 0.15   | 0.035  | 0.017   | 0.15  | 0.005   | 0.008   | 0.009   | 0.06   | 0.06  |
| VA | 0.002  | 0.005  | 0.0002  | 0.81  | <0.0001 | 0.0002  | 0.02    | 0.0002 | 0.32  |
| VT | NaN    | 0.74   | 0.53    | NaN   | 0.043   | 0.48    | NaN     | 1.00   | NaN   |
| WA | 1.00   | 0.84   | 0.004   | NaN   | 0.001   | 0.038   | NaN     | 0.27   | NaN   |
| WI | 0.19   | 0.0003 | 0.001   | NaN   | <0.0001 | 0.0004  | NaN     | 0.07   | 0.10  |
| WV | 0.64   | 0.42   | 0.015   | 0.87  | 0.44    | 0.18    | 0.55    | 0.74   | NaN   |
| WY | NaN    | NaN    | NaN     | NaN   | NaN     | NaN     | NaN     | NaN    | NaN   |

**Substance Key:** 1. Cannabinoids, 2. Club drugs, 3. Cocaine, 4. Hallucinogens, 5. Heroin, 6. Methamphetamine, 7. Prescription benzodiazepines, 8. Prescription opioids, 9. Prescription stimulants

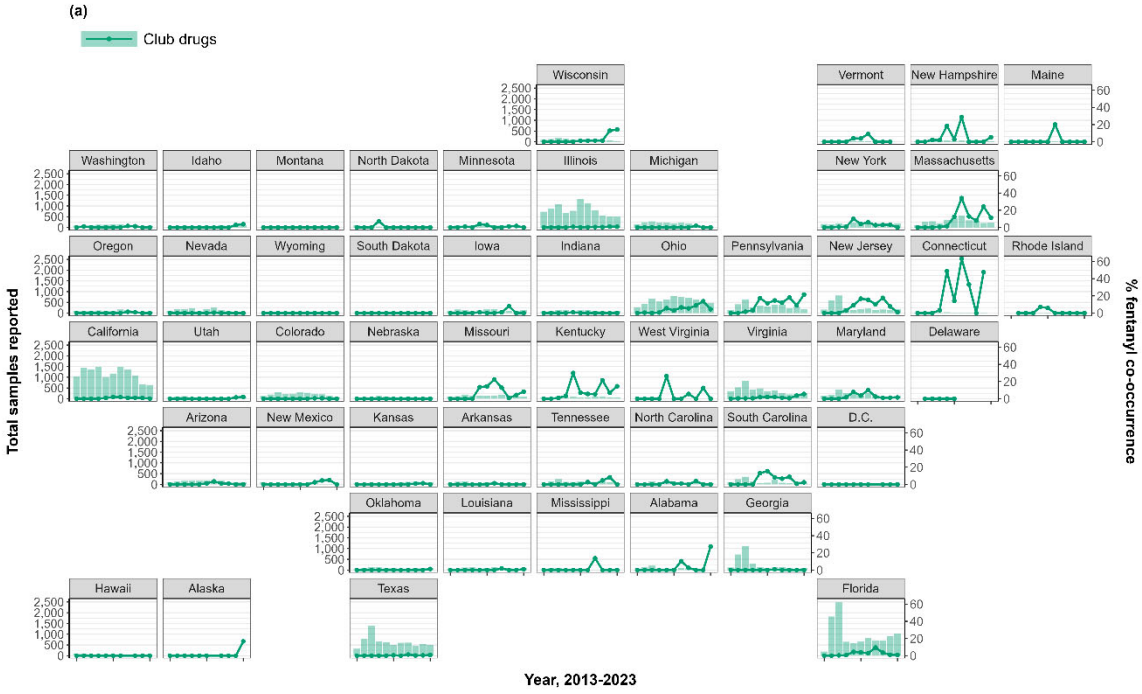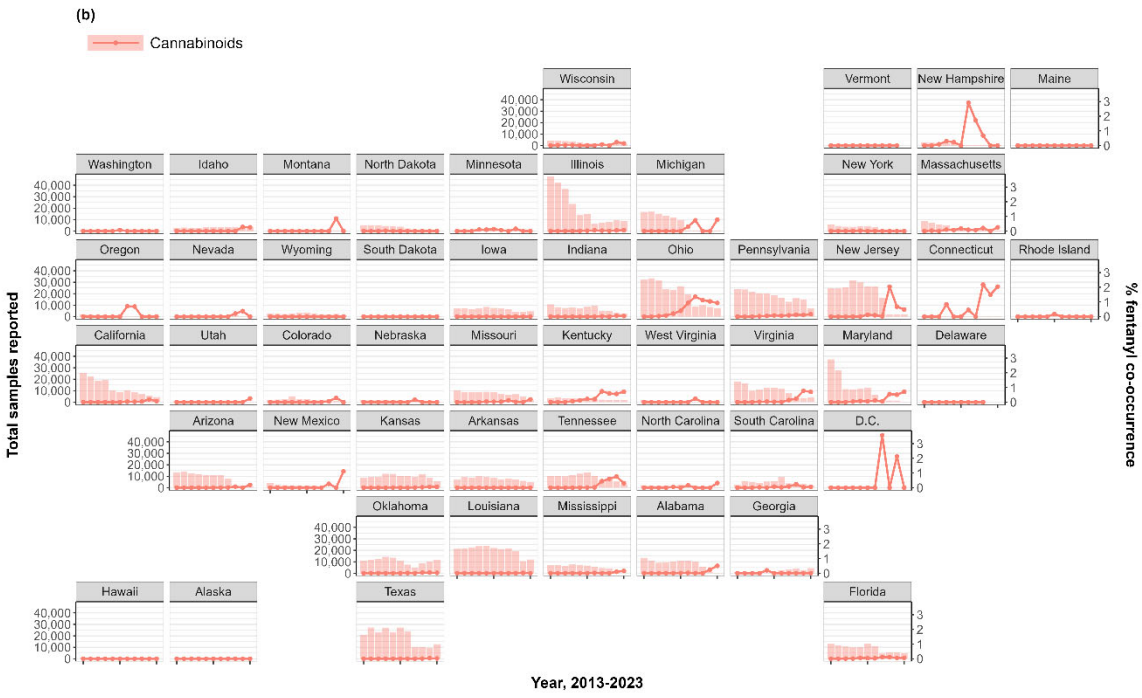

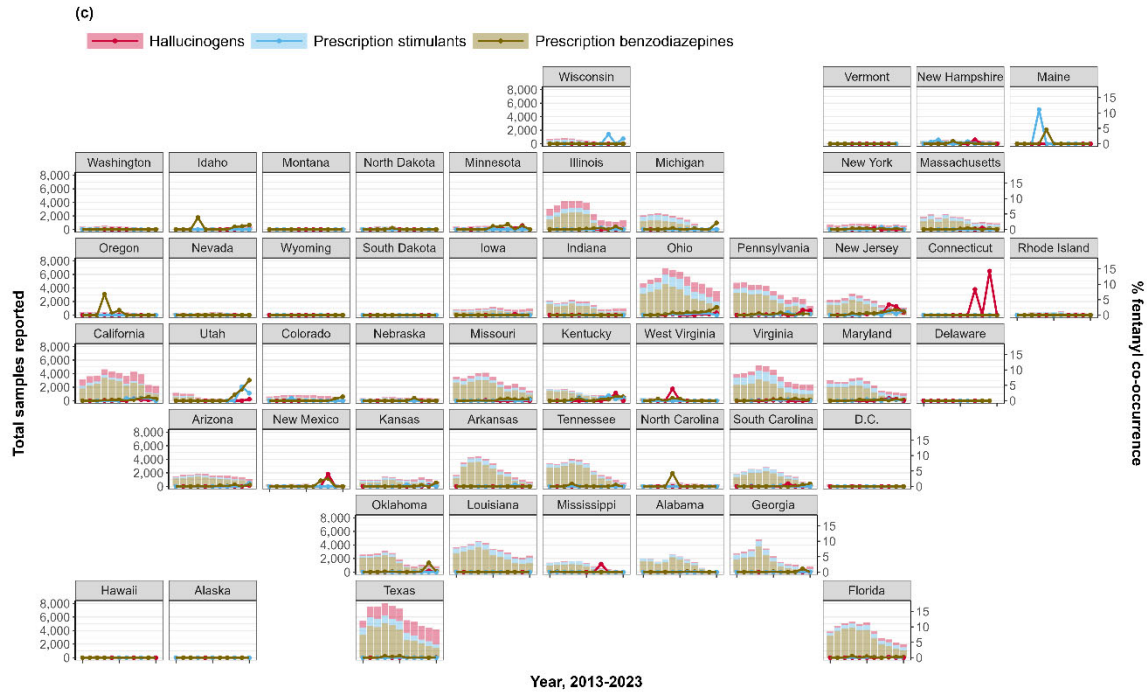

**Supplementary Figure 2.** State-level trends in the yearly proportion of different substance samples with co-occurring fentanyl in the United States, 2013-2023. The following data points were excluded from the figure since the number of total tested samples was  $\leq 5$ , which caused unstable estimates. For club drugs: DE (year: 2019) and CT (2023). For prescription benzodiazepines: ME (2022). Fentanyl co-occurrence among prescription benzodiazepines samples was 25.0% for CT in the year 2022.

## References

1. Pitts WJ, Heller D, Smiley-McDonald H, et al. Understanding research methods, limitations, and applications of drug data collected by the National Forensic Laboratory Information System (NFLIS-Drug). *J Forensic Sci.* 2023;68(4):1335-1342. doi:10.1111/1556-4029.15269
2. Diversion Control Division. National Forensic Laboratory Information System: NFLIS-Drug 2022 Midyear Report. U.S. Department of Justice, U.S. Drug Enforcement Administration. April 2023. Accessed June 26, 2023. <https://www.nflis.deadiversion.usdoj.gov/publicationsRedesign.xhtml>
3. U.S. Drug Enforcement Administration. *National Forensic Laboratory Information System: Year 2013 Annual Report.*; 2014.
4. Diversion Control Division. *National Forensic Laboratory Information System: NFLIS-Drug 2022 Annual Report.*; 2023.
5. Drug Enforcement Administration Diversion Control Division. *NFLIS Brief: Fentanyl, 2001-2015.*; 2017. <https://www.deadiversion.usdoj.gov/nflis/2017fentanyl.pdf>
